1 **Cross-reactive neutralization of SARS-CoV-2 by serum antibodies from recovered SARS**  
2 **patients and immunized animals**

3 Yuanmei Zhu<sup>1†</sup>, Danwei Yu<sup>1†</sup>, Yang Han<sup>2†</sup>, Hongxia Yan<sup>1</sup>, Huihui Chong<sup>1</sup>, Lili Ren<sup>1</sup>, Jianwei  
4 Wang<sup>1\*</sup>, Taisheng Li<sup>2\*</sup>, Yuxian He<sup>1\*</sup>

5 <sup>1</sup>NHC Key Laboratory of Systems Biology of Pathogens, Institute of Pathogen Biology,  
6 Chinese Academy of Medical Sciences and Peking Union Medical College, Beijing, China

7 <sup>2</sup>Department of Infectious Diseases, Peking Union Medical College Hospital, Chinese  
8 Academy of Medical Sciences, Beijing, China

9  
10 Short title: Cross-reactive neutralization of SARS-CoV-2

11

12 <sup>†</sup>These authors contributed equally to this work.

13 <sup>\*†</sup>Correspondence to J.W. (wangjw28@163.com), T. L. (litsh@263.net), or Y.H.  
14 (yhe@ipb.pumc.edu.cn).  
15

16 **Abstract**

17 The current COVID-19 pandemic, caused by a novel coronavirus SARS-CoV-2, poses serious  
18 threats to public health and social stability, calling for urgent need for vaccines and  
19 therapeutics. SARS-CoV-2 is genetically close to SARS-CoV, thus it is important to define  
20 the between antigenic cross-reactivity and neutralization. In this study, we firstly analyzed 20  
21 convalescent serum samples collected from SARS-CoV infected individuals during the 2003  
22 SARS outbreak. All patient sera reacted strongly with the S1 subunit and receptor-binding  
23 domain (RBD) of SARS-CoV, cross-reacted with the S ectodomain, S1, RBD, and S2  
24 proteins of SARS-CoV-2, and neutralized both SARS-CoV and SARS-CoV-2 S  
25 protein-driven infections. Multiple panels of antisera from mice and rabbits immunized with a  
26 full-length S and RBD immunogens of SARS-CoV were also characterized, verifying the  
27 cross-reactive neutralization against SARS-CoV-2. Interestingly, we found that a palm civet  
28 SARS-CoV-derived RBD elicited more potent cross-neutralizing responses in immunized  
29 animals than the RBD from a human SARS-CoV strain, informing a strategy to develop a  
30 universe vaccine against emerging CoVs.

31

32 **Summary**

33 Serum antibodies from SARS-CoV infected patients and immunized animals cross-neutralize  
34 SARS-CoV-2 suggests strategies for universe vaccines against emerging CoVs.

## 35 **Introduction**

36 The global outbreak of the Coronavirus Disease 2019 (COVID-19) was caused by severe  
37 acute respiratory syndrome coronavirus 2 (SARS-CoV-2), which is a new coronavirus (CoV)  
38 genetically close to SARS-CoV emerged in 2002 (1-3). As of 20 April 2020, a total of  
39 2,246,291 confirmed COVID-19 cases, including 152,707 deaths, have been reported from  
40 213 countries or regions, and the numbers are growing rapidly (<https://www.who.int>). The  
41 pandemic threatens to become one of the most difficult times faced by humans in modern  
42 history. Unfortunately, even though 17 years passed, we have not developed effective  
43 prophylactics and therapeutics in preparedness for the re-emergence of SARS or SARS-like  
44 CoVs. A vaccine is urgently needed to prevent the human-to-human transmission of  
45 SARS-CoV-2.

46 Like SARS-CoV and many other CoVs, SARS-CoV-2 utilizes its surface spike (S)  
47 glycoprotein to gain entry into host cells (4-6). Typically, the S protein forms a homotrimer  
48 with each protomer consisting of S1 and S2 subunits. The N-terminal S1 subunit is  
49 responsible for virus binding to the cellular receptor ACE2 through an internal  
50 receptor-binding domain (RBD) that is capable of functional folding independently, whereas  
51 the membrane-proximal S2 subunit mediates membrane fusion events. Very recently, the  
52 prefusion structure of the SARS-CoV-2 S protein was determined by cryo-EM, which  
53 revealed an overall similarity to that of SARS-CoV (4, 7); the crystal structure of the  
54 SARS-CoV-2 RBD in complex with ACE2 was also determined by several independent  
55 groups, and the residues or motifs critical for the higher-affinity RBD-ACE2 interaction were  
56 identified (8-10).

57       The S protein of CoVs is also a main target of neutralizing antibodies (nAbs) thus being  
58 considered an immunogen for vaccine development (4, 11). During the SARS-CoV outbreak  
59 in 2002, we took immediate actions to characterize the immune responses in infected SARS  
60 patients and in inactivated virus vaccine- or S protein-immunized animals (12-20). We  
61 demonstrated that the S protein RBD dominates the nAb response against SARS-CoV  
62 infection and thus proposed a RBD-based vaccine strategy (11, 15-22). Our follow-up studies  
63 verified a potent and persistent anti-RBD response in recovered SARS patients (23-25).  
64 Although SARS-CoV-2 and SARS-CoV share substantial genetic and functional similarities,  
65 their S proteins, especially in the RBD sequences, display relatively larger divergences.  
66 Toward developing vaccines and immunotherapeutics against emerging CoVs, it is  
67 fundamentally important to characterize the antigenic cross-reactivity between SARS-CoV-2  
68 and SARS-CoV.

69

## 70 **Results**

### 71 **Serum antibodies from recovered SARS patients react strongly with the S protein of** 72 **SARS-CoV-2**

73 A panel of serum samples collected from 20 patients recovered from SARS-CoV infection  
74 was analyzed for the antigenic cross-reactivity with SARS-CoV-2. Firstly, we examined the  
75 convalescent sera by a commercial diagnostic ELISA kit, which uses a recombinant  
76 nucleocapsid (N) protein of SARS-CoV-2 as detection antigen. As shown in Figure 1A, all the  
77 serum samples at a 1:100 dilution displayed high reactivity, verifying that the N antigen is  
78 highly conserved between SARS-CoV and SARS-CoV-2. As tested by ELISA, each of the

79 patient sera also reacted with the SARS-CoV S1 subunit and its RBD strongly (Fig. 1B). Then,  
80 we determined the cross-reactivity of the patient sera with four recombinant protein antigens  
81 derived from the S protein of SARS-CoV-2, including S ectodomain (designated S), S1  
82 subunit, RBD, and S2 subunit. As shown in Fig. 1C, all the serum samples also reacted  
83 strongly with the S and S2 proteins, but they were less reactive with the S1 and RBD proteins.

#### 84 **Serum antibodies from recovered SARS patients cross-neutralize SARS-CoV-2**

85 As limited by facility that can handle authentic viruses, we developed a pseudovirus-based  
86 single-cycle infection assay to determine the cross-neutralizing activity of the convalescent  
87 SARS sera on SARS-CoV and SARS-CoV-2. The pseudotype for vesicular stomatitis virus  
88 (VSV-G) was also prepared as a virus control. Initially, the serum samples were analyzed at a  
89 1:20 dilution. As shown in Fig. 2A, all the sera efficiently neutralized both the SARS-CoV  
90 and SARS-CoV-2 pseudoviruses to infect 239T/ACE2 cells, and in comparison, each serum  
91 had lower efficiency in inhibiting SARS-CoV-2 as compared to SARS-CoV. None of the  
92 immune sera showed appreciable neutralizing activity on VSV-G pseudovirus. The  
93 neutralizing titer for each patient serum was then determined. As shown in Fig. 2B, the patient  
94 sera could neutralize SARS-CoV with titers ranging from 1:120 to 1: 3,240 and  
95 cross-neutralized SARS-CoV-2 with titers ranging from 1:20 to 1: 360. In highlight, the  
96 patient P08 serum had the highest titer to neutralize SARS-CoV (1: 3,240) when it neutralized  
97 SARS-CoV-2 with a titer of 1:120; the patient P13 serum showed the highest titer on  
98 SARS-CoV-2 (1:360) when it had a 1:1,080 titer to efficiently neutralize SARS-CoV.

#### 99 **Mouse antisera raised against SARS-CoV S protein react and neutralize SARS-CoV-2**

100 To comprehensively characterize the cross-reactivity between the S proteins of SARS-CoV

101 and SARS-CoV-2, we generated mouse antisera against the S protein of SARS-CoV by  
102 immunization. Herein, three mice (M-1, M-2, and M-3) were immunized with a recombinant  
103 full-length S protein in the presence of MLP-TDM adjuvant, while two mice (M-4 and M-5)  
104 were immunized with the S protein plus alum adjuvant. Binding of antisera to diverse S  
105 antigens were initially examined by ELISA. As shown in Fig. 3A, the mice immunized by the  
106 S protein with the MLP-TDM adjuvant developed relatively higher titers of antibody  
107 responses as compared to the two mice with the alum adjuvant. Apparently, each of mouse  
108 antisera had high cross-reactivity with the SARS-CoV-2 S and S2 proteins, but the  
109 cross-reactive antibodies specific for the SARS-CoV-2 S1 and RBD were hardly detected  
110 except the anti-S1 response in mouse M3. Subsequently, the neutralizing capacity of mouse  
111 anti-S sera was measured with pseudoviruses. As shown in Fig. 3B to 3F, all the antisera,  
112 diluted at 1: 40, 1: 160, or 1: 640, potently neutralized SARS-CoV, and consistently, they  
113 were able to cross-neutralize SARS-CoV-2 although with reduced capacity relative to  
114 SARS-CoV.

#### 115 **Mouse and rabbit antisera developed against SARS-CoV RBD cross-react and** 116 **neutralize SARS-CoV-2**

117 As the S protein RBD dominates the nAb response to SARS-CoV, we sought to characterize  
118 the RBD-mediated cross-reactivity and neutralization on SARS-CoV-2. To this end, we firstly  
119 generated mouse anti-RBD sera by immunization with two RBD-Fc fusion proteins: one  
120 encoding the RBD sequence of a palm civet SARS-CoV strain SZ16 (SZ16-RBD) and the  
121 second one with the RBD sequence of a human SARS-CoV strain GD03 (GD03-RBD). As  
122 shown in Fig. 4A, all of eight mice developed robust antibody responses against the

123 SARS-CoV S1 and RBD; and in comparison, four mice (m1 to m4) immunized with  
124 SZ16-RBD exhibited higher titers of antibody responses than the mice (m5 to m8) immunized  
125 with GD03-RBD. Each of anti-RBD sera cross-reacted well with the S protein of  
126 SARS-CoV-2, suggesting that SARS-CoV and SARS-CoV-2 do share antigenically conserved  
127 epitopes in the RBD sites. Noticeably, while the SZ16-RBD immune sera also reacted with  
128 the SARS-CoV-2 RBD antigen, the reactivity of the GD03-RBD immune sera was hardly  
129 detected, implying that recombinant RBD protein of SARS-CoV-2 used here might not be  
130 correctly folded to mimic the antigenic conformation presented on its S protein. Similarly, the  
131 neutralizing activity of mouse antisera was determined by pseudovirus-based single-cycle  
132 infection assay. As shown by Fig. 4B to 4I, each antiserum even at a high dilution (1:640)  
133 displayed very potent activity to neutralize SARS-CoV; they also cross-neutralized  
134 SARS-CoV-2 with relatively lower efficiency.

135 We further developed rabbit antisera by immunizations, in which two rabbits were  
136 immunized with SZ16-RBD and two rabbits were with GD03-RBD. Interestingly, both RBD  
137 proteins elicited antibodies highly reactive with both the SARS-CoV and SARS-CoV-2  
138 antigens (Fig. S1), which were different from their immunizations in mice. As expected, all of  
139 the rabbit antisera potently neutralized both SARS-CoV and SARS-CoV-2 in a similar profile  
140 with that of the mouse anti-S and anti-RBD sera. Again, the results verified that the  
141 SARS-CoV S protein and its RBD immunogens can induce cross-neutralizing antibodies  
142 toward SARS-CoV-2 by vaccination.

143 **Rabbit antibodies induced by SZ16-RBD but not GD03 can block RBD binding to**  
144 **293T/ACE2 cells**

145 To validate the observed cross-reactive neutralization and explore the underlying mechanism,  
146 we purified anti-RBD antibodies from the rabbit antisera above. As shown in Fig. 5A, four  
147 purified rabbit anti-RBD antibodies reacted strongly with the SARS-CoV RBD protein and  
148 cross-reacted with the SARS-CoV-2 S and RBD but not S2 proteins in a dose-dependent  
149 manner. Consistent to its antiserum, the purified rabbit R-4 antibody was less reactive with the  
150 SARS-CoV-2 antigens. Moreover, the purified antibodies dose-dependently neutralized  
151 SARS-CoV and SARS-CoV-2 but not VSV-G (Fig. 5B). Next, we investigated whether the  
152 rabbit anti-RBD antibodies block RBD binding to 293T/ACE2 cells by flow cytometry. As  
153 expected, both the SARS-CoV and SARS-CoV-2 RBD proteins could bind to 293T/ACE2  
154 cells in a dose-dependent manner, and in a line with previous findings that the RBD of  
155 SARS-CoV-2 bind to ACE2 more efficiently (Fig. S2). Surprisingly, the antibodies purified  
156 from SZ16-RBD-immunized rabbits (R-1 and R-2) potently blocked the binding of both the  
157 RBD proteins, whereas the antibodies from GD03-RBD-immunized rabbits (R-3 and R-4) had  
158 no such blocking functionality except a high concentration of the rabbit R-3 antibody on the  
159 SARS-CoV RBD binding (Fig. 6).

160

## 161 **Discussion**

162 To develop effective vaccines and immunotherapeutics against emerging CoVs, the antigenic  
163 cross-reactivity between SARS-CoV-2 and SARS-CoV is a key scientific question need be  
164 addressed as soon as possible. However, after the SARS-CoV outbreak more than 17 years  
165 there are very limited blood samples from SARS-CoV infected patients currently available for  
166 such studies. At the moment, Hoffmann *et al.* analyzed three convalescent SARS patient sera



167 and found that both SARS-CoV-2 and SARS-CoV S protein-driven infections were inhibited  
168 by diluted sera but the inhibition of SARS-CoV-2 was less efficient (26); Qu and coauthors  
169 detected one SARS patient serum that was collected at two years after recovery, which  
170 showed a serum neutralizing titer of > 1: 80 dilution for SARS-CoV pseudovirus and of 1:40  
171 dilution for SARS-CoV-2 pseudovirus (27). While these studies supported the  
172 cross-neutralizing activity of the convalescent SARS sera on SARS-CoV-2, a just published  
173 study with the plasma from seven SARS-CoV infected patients suggested that cross-reactive  
174 antibody binding responses to the SARS-CoV-2 S protein did exist, but cross-neutralizing  
175 responses could not be detected (28). In this study, we firstly investigated the cross-reactivity  
176 and neutralization with a panel of precious immune sera collected from 20 recovered SARS  
177 patients. As shown, all the patient sera displayed high titers of antibodies against the S1 and  
178 RBD proteins of SARS-CoV and cross-reacted strongly with the S protein of SARS-CoV-2.  
179 In comparison, the patient sera had higher reactivity with the S2 subunit of SARS-CoV-2  
180 relative to its S1 subunit and RBD protein, consistent with a higher sequence conservation  
181 between the S2 subunits of SARS-CoV-2 and SARS-CoV than that of their S1 subunits and  
182 RBDs (3, 4). Importantly, each of the patient sera could cross-neutralize SARS-CoV-2 with  
183 serum titers ranging from 1:20 to 1:360 dilutions, verifying the cross-reactive neutralizing  
184 activity of the SARS patient sera on the S protein of SARS-CoV-2.

185 Currently, two strategies are being explored for developing vaccines against emerging  
186 CoVs. The first one is based on a full-length S protein or its ectodomain, while the second  
187 utilizes a minimal but functional RBD protein as vaccine immunogen. Our previous studies  
188 revealed that the RBD site contains multiple groups of conformation-dependent neutralizing

189 epitopes: some epitopes are critically involved in RBD binding to the cell receptor ACE2,  
190 whereas other epitopes possess neutralizing function but do not interfere with the RBD-ACE2  
191 interaction (15, 18). Indeed, most of neutralizing monoclonal antibodies (mAbs) previously  
192 developed against SARS-CoV target the RBD epitopes, while a few are directed against the  
193 S2 subunit or the S1/S2 cleavage site (29, 30). The cross-reactivity of such mAbs with  
194 SARS-CoV-2 has been characterized, and it was found that many SARS-CoV-neutralizing  
195 mAbs exhibit no cross-neutralizing capacity (9, 31). For example, CR3022, a neutralizing  
196 antibody isolated from a convalescent SARS patient, cross-reacted with the RBD of  
197 SARS-CoV-2 but did not neutralize the virus (31, 32). Nonetheless, a new human anti-RBD  
198 mAb, 47D11, has just been isolated from transgenic mice immunized with a SARS-CoV S  
199 protein, which neutralizes both SARS-CoV-2 and SARS-CoV (33). The results of polyclonal  
200 antisera from immunized animals are quite inconsistent. For examples, Walls *et al.* reported  
201 that plasma from four mice immunized with a SARS-CoV S protein could completely inhibit  
202 SARS-CoV pseudovirus and reduced SARS-CoV-2 pseudovirus to ~10% of control, thus  
203 proposing that immunity against one virus of the sarbecovirus subgenus can potentially  
204 provide protection against related viruses (4); two rabbit sera raised against the S1 subunit of  
205 SARS-CoV also reduced SARS-CoV-2-S-driven cell entry, although with lower efficiency as  
206 compared to SARS-CoV-S (26). Moreover, four mouse antisera against the SARS-CoV RBD  
207 cross-reacted efficiently with the SARS-CoV-2 RBD and neutralized SARS-CoV-2,  
208 suggesting the potential to develop a SARS-CoV RBD-based vaccine preventing  
209 SARS-CoV-2 either (34). Differently, it was reported that plasma from mice infected or  
210 immunized by SARS-CoV failed to neutralize SARS-CoV-2 infection in Vero E6 cells (28),

211 and mouse antisera raised against the SARS-CoV RBD were even unable to bind to the S  
212 protein of SARS-CoV-2 (9). In our studies, several panels of antisera against the SARS-CoV  
213 S and RBD proteins were comprehensively characterized, which provided convincing data to  
214 validate the cross-reactivity and cross-neutralization between SARS-CoV and SARS-CoV-2.  
215 Meaningfully, this work found that the RBD proteins derived from different SARS-CoV  
216 strains can elicit antibodies with unique functionalities: while the RBD from a palm civet  
217 SARS-CoV (SZ16) induced potent antibodies capable of blocking the RBD-receptor binding,  
218 the antibodies elicited by the RBD derived from a human strain (GD03) had no such effect  
219 despite their neutralizing activities. SZ16-RBD shares an overall 74% amino-acid sequence  
220 identity with the RBD of SARS-CoV-2, when their internal receptor-binding motifs (RBM)  
221 display more dramatic substitutions (~50% sequence identity); however, SZ16-RBD and  
222 GD03-RBD only differ from three amino acids, all locate within the RBM. How these  
223 mutations change the antigenicity and immunogenicity of the S protein and RBD  
224 immunogens requires more efforts.

225 Lastly, we would like to discuss three more questions. First, it is intriguing to know  
226 whether individuals who recovered from previous SARS-CoV infection can recall the  
227 immunity against SARS-CoV-2 infection. For this, an epidemiological investigation on the  
228 populations exposed to SARS-CoV-2 would provide valuable insights. Second, whether a  
229 universe vaccine can be rationally designed by engineering the S protein RBD sequences.  
230 Third, although antibody-dependent infection enhancement (ADE) was not observed during  
231 our studies with the human and animal serum antibodies, this effect should be carefully  
232 addressed in vaccine development.

233

## 234 **References and Notes**

- 235 1. N. Zhu, D. Zhang, W. Wang, X. Li, B. Yang, J. Song, X. Zhao, B. Huang, W. Shi, R. Lu, P. Niu, F. Zhan, X. Ma,  
236 D. Wang, W. Xu, G. Wu, G. F. Gao, W. Tan, I. China Novel Coronavirus, T. Research, A Novel Coronavirus  
237 from Patients with Pneumonia in China, 2019. *The New England journal of medicine* **382**, 727-733  
238 (2020); published online EpubFeb 20 (10.1056/NEJMoa2001017).
- 239 2. P. Zhou, X. L. Yang, X. G. Wang, B. Hu, L. Zhang, W. Zhang, H. R. Si, Y. Zhu, B. Li, C. L. Huang, H. D. Chen, J.  
240 Chen, Y. Luo, H. Guo, R. D. Jiang, M. Q. Liu, Y. Chen, X. R. Shen, X. Wang, X. S. Zheng, K. Zhao, Q. J. Chen,  
241 F. Deng, L. L. Liu, B. Yan, F. X. Zhan, Y. Y. Wang, G. F. Xiao, Z. L. Shi, A pneumonia outbreak associated  
242 with a new coronavirus of probable bat origin. *Nature* **579**, 270-273 (2020); published online EpubMar  
243 (10.1038/s41586-020-2012-7).
- 244 3. F. Wu, S. Zhao, B. Yu, Y. M. Chen, W. Wang, Z. G. Song, Y. Hu, Z. W. Tao, J. H. Tian, Y. Y. Pei, M. L. Yuan, Y.  
245 L. Zhang, F. H. Dai, Y. Liu, Q. M. Wang, J. J. Zheng, L. Xu, E. C. Holmes, Y. Z. Zhang, A new coronavirus  
246 associated with human respiratory disease in China. *Nature* **579**, 265-269 (2020); published online  
247 EpubMar (10.1038/s41586-020-2008-3).
- 248 4. A. C. Walls, Y. J. Park, M. A. Tortorici, A. Wall, A. T. McGuire, D. Veessler, Structure, Function, and  
249 Antigenicity of the SARS-CoV-2 Spike Glycoprotein. *Cell*, (2020); published online EpubMar 6  
250 (10.1016/j.cell.2020.02.058).
- 251 5. Y. Wan, J. Shang, R. Graham, R. S. Baric, F. Li, Receptor Recognition by the Novel Coronavirus from  
252 Wuhan: an Analysis Based on Decade-Long Structural Studies of SARS Coronavirus. *Journal of virology*  
253 **94**, (2020); published online EpubMar 17 (10.1128/JVI.00127-20).
- 254 6. M. A. Tortorici, D. Veessler, Structural insights into coronavirus entry. *Advances in virus research* **105**,  
255 93-116 (2019)10.1016/bs.aivir.2019.08.002).
- 256 7. D. Wrapp, N. Wang, K. S. Corbett, J. A. Goldsmith, C. L. Hsieh, O. Abiona, B. S. Graham, J. S. McLellan,  
257 Cryo-EM structure of the 2019-nCoV spike in the prefusion conformation. *Science* **367**, 1260-1263  
258 (2020); published online EpubMar 13 (10.1126/science.abb2507).
- 259 8. J. Lan, J. Ge, J. Yu, S. Shan, H. Zhou, S. Fan, Q. Zhang, X. Shi, Q. Wang, L. Zhang, X. Wang, Structure of  
260 the SARS-CoV-2 spike receptor-binding domain bound to the ACE2 receptor. *Nature*, (2020);  
261 published online EpubMar 30 (10.1038/s41586-020-2180-5).
- 262 9. Q. Wang, Y. Zhang, L. Wu, S. Niu, C. Song, Z. Zhang, G. Lu, C. Qiao, Y. Hu, K. Y. Yuen, Q. Wang, H. Zhou, J.  
263 Yan, J. Qi, Structural and Functional Basis of SARS-CoV-2 Entry by Using Human ACE2. *Cell*, (2020);  
264 published online EpubApr 7 (10.1016/j.cell.2020.03.045).
- 265 10. J. Shang, G. Ye, K. Shi, Y. Wan, C. Luo, H. Aihara, Q. Geng, A. Auerbach, F. Li, Structural basis of receptor  
266 recognition by SARS-CoV-2. *Nature*, (2020); published online EpubMar 30  
267 (10.1038/s41586-020-2179-y).
- 268 11. L. Du, Y. He, Y. Zhou, S. Liu, B. J. Zheng, S. Jiang, The spike protein of SARS-CoV--a target for vaccine and  
269 therapeutic development. *Nature reviews. Microbiology* **7**, 226-236 (2009); published online EpubMar  
270 (10.1038/nrmicro2090).
- 271 12. Y. He, Y. Zhou, P. Siddiqui, J. Niu, S. Jiang, Identification of immunodominant epitopes on the  
272 membrane protein of the severe acute respiratory syndrome-associated coronavirus. *Journal of clinical*  
273 *microbiology* **43**, 3718-3726 (2005); published online EpubAug (10.1128/JCM.43.8.3718-3726.2005).
- 274 13. Y. He, Y. Zhou, H. Wu, B. Luo, J. Chen, W. Li, S. Jiang, Identification of immunodominant sites on the  
275 spike protein of severe acute respiratory syndrome (SARS) coronavirus: implication for developing SARS

- 276           diagnostics and vaccines. *Journal of immunology* **173**, 4050-4057 (2004); published online EpubSep 15  
277           (10.4049/jimmunol.173.6.4050).
- 278   14.    Y. He, Y. Zhou, H. Wu, Z. Kou, S. Liu, S. Jiang, Mapping of antigenic sites on the nucleocapsid protein of  
279           the severe acute respiratory syndrome coronavirus. *Journal of clinical microbiology* **42**, 5309-5314  
280           (2004); published online EpubNov (10.1128/JCM.42.11.5309-5314.2004).
- 281   15.    Y. He, J. Li, W. Li, S. Lustigman, M. Farzan, S. Jiang, Cross-neutralization of human and palm civet severe  
282           acute respiratory syndrome coronaviruses by antibodies targeting the receptor-binding domain of  
283           spike protein. *Journal of immunology* **176**, 6085-6092 (2006); published online EpubMay 15  
284           (10.4049/jimmunol.176.10.6085).
- 285   16.    Y. He, J. Li, S. Heck, S. Lustigman, S. Jiang, Antigenic and immunogenic characterization of recombinant  
286           baculovirus-expressed severe acute respiratory syndrome coronavirus spike protein: implication for  
287           vaccine design. *Journal of virology* **80**, 5757-5767 (2006); published online EpubJun  
288           (10.1128/JVI.00083-06).
- 289   17.    Y. He, Q. Zhu, S. Liu, Y. Zhou, B. Yang, J. Li, S. Jiang, Identification of a critical neutralization determinant  
290           of severe acute respiratory syndrome (SARS)-associated coronavirus: importance for designing SARS  
291           vaccines. *Virology* **334**, 74-82 (2005); published online EpubMar 30 (10.1016/j.virol.2005.01.034).
- 292   18.    Y. He, H. Lu, P. Siddiqui, Y. Zhou, S. Jiang, Receptor-binding domain of severe acute respiratory  
293           syndrome coronavirus spike protein contains multiple conformation-dependent epitopes that induce  
294           highly potent neutralizing antibodies. *Journal of immunology* **174**, 4908-4915 (2005); published online  
295           EpubApr 15 (10.4049/jimmunol.174.8.4908).
- 296   19.    Y. He, Y. Zhou, P. Siddiqui, S. Jiang, Inactivated SARS-CoV vaccine elicits high titers of spike  
297           protein-specific antibodies that block receptor binding and virus entry. *Biochemical and biophysical*  
298           *research communications* **325**, 445-452 (2004); published online EpubDec 10  
299           (10.1016/j.bbrc.2004.10.052).
- 300   20.    Y. He, Y. Zhou, S. Liu, Z. Kou, W. Li, M. Farzan, S. Jiang, Receptor-binding domain of SARS-CoV spike  
301           protein induces highly potent neutralizing antibodies: implication for developing subunit vaccine.  
302           *Biochemical and biophysical research communications* **324**, 773-781 (2004); published online EpubNov  
303           12 (10.1016/j.bbrc.2004.09.106).
- 304   21.    Y. He, J. Li, L. Du, X. Yan, G. Hu, Y. Zhou, S. Jiang, Identification and characterization of novel neutralizing  
305           epitopes in the receptor-binding domain of SARS-CoV spike protein: revealing the critical antigenic  
306           determinants in inactivated SARS-CoV vaccine. *Vaccine* **24**, 5498-5508 (2006); published online  
307           EpubJun 29 (10.1016/j.vaccine.2006.04.054).
- 308   22.    Y. He, S. Jiang, Vaccine design for severe acute respiratory syndrome coronavirus. *Viral immunology* **18**,  
309           327-332 (2005)10.1089/vim.2005.18.327).
- 310   23.    L. Liu, J. Xie, J. Sun, Y. Han, C. Zhang, H. Fan, Z. Liu, Z. Qiu, Y. He, T. Li, Longitudinal profiles of  
311           immunoglobulin G antibodies against severe acute respiratory syndrome coronavirus components and  
312           neutralizing activities in recovered patients. *Scandinavian journal of infectious diseases* **43**, 515-521  
313           (2011); published online EpubJul (10.3109/00365548.2011.560184).
- 314   24.    Z. Cao, L. Liu, L. Du, C. Zhang, S. Jiang, T. Li, Y. He, Potent and persistent antibody responses against the  
315           receptor-binding domain of SARS-CoV spike protein in recovered patients. *Virology journal* **7**, 299  
316           (2010); published online EpubNov 4 (10.1186/1743-422X-7-299).
- 317   25.    T. Li, J. Xie, Y. He, H. Fan, L. Baril, Z. Qiu, Y. Han, W. Xu, W. Zhang, H. You, Y. Zuo, Q. Fang, J. Yu, Z. Chen, L.  
318           Zhang, Long-term persistence of robust antibody and cytotoxic T cell responses in recovered patients  
319           infected with SARS coronavirus. *PLoS one* **1**, e24 (2006); published online EpubDec 20

- 320 (10.1371/journal.pone.0000024).
- 321 26. M. Hoffmann, H. Kleine-Weber, S. Schroeder, N. Kruger, T. Herrler, S. Erichsen, T. S. Schiergens, G.  
322 Herrler, N. H. Wu, A. Nitsche, M. A. Muller, C. Drosten, S. Pohlmann, SARS-CoV-2 Cell Entry Depends on  
323 ACE2 and TMPRSS2 and Is Blocked by a Clinically Proven Protease Inhibitor. *Cell*, (2020); published  
324 online EpubMar 4 (10.1016/j.cell.2020.02.052).
- 325 27. X. Ou, Y. Liu, X. Lei, P. Li, D. Mi, L. Ren, L. Guo, R. Guo, T. Chen, J. Hu, Z. Xiang, Z. Mu, X. Chen, J. Chen, K.  
326 Hu, Q. Jin, J. Wang, Z. Qian, Characterization of spike glycoprotein of SARS-CoV-2 on virus entry and its  
327 immune cross-reactivity with SARS-CoV. *Nature communications* **11**, 1620 (2020); published online  
328 EpubMar 27 (10.1038/s41467-020-15562-9).
- 329 28. L. e. al., Cross-reactive antibody response between SARS-CoV-2 and SARS-CoV infections. *bioRxiv*  
330 *preprint doi: <https://doi.org/10.1101/2020.03.15.993097>*.
- 331 29. S. Jiang, C. Hillyer, L. Du, Neutralizing Antibodies against SARS-CoV-2 and Other Human Coronaviruses.  
332 *Trends in immunology*, (2020); published online EpubApr 2 (10.1016/j.it.2020.03.007).
- 333 30. G. Zhou, Q. Zhao, Perspectives on therapeutic neutralizing antibodies against the Novel Coronavirus  
334 SARS-CoV-2. *International journal of biological sciences* **16**, 1718-1723 (2020)10.7150/ijbs.45123).
- 335 31. X. Tian, C. Li, A. Huang, S. Xia, S. Lu, Z. Shi, L. Lu, S. Jiang, Z. Yang, Y. Wu, T. Ying, Potent binding of 2019  
336 novel coronavirus spike protein by a SARS coronavirus-specific human monoclonal antibody. *Emerging*  
337 *microbes & infections* **9**, 382-385 (2020)10.1080/22221751.2020.1729069).
- 338 32. M. Yuan, N. C. Wu, X. Zhu, C. D. Lee, R. T. Y. So, H. Lv, C. K. P. Mok, I. A. Wilson, A highly conserved  
339 cryptic epitope in the receptor-binding domains of SARS-CoV-2 and SARS-CoV. *Science*, (2020);  
340 published online EpubApr 3 (10.1126/science.abb7269).
- 341 33. W. e. al., A human monoclonal antibody blocking SARS-CoV-2 infection. *bioRxiv preprint doi:*  
342 *<https://doi.org/10.1101/2020.03.11.987958>*.
- 343 34. W. Tai, L. He, X. Zhang, J. Pu, D. Voronin, S. Jiang, Y. Zhou, L. Du, Characterization of the  
344 receptor-binding domain (RBD) of 2019 novel coronavirus: implication for development of RBD protein  
345 as a viral attachment inhibitor and vaccine. *Cellular & molecular immunology*, (2020); published  
346 online EpubMar 19 (10.1038/s41423-020-0400-4).

347

## 348 **Acknowledgements**

349 **Funding:** This work was supported by grants from the National Natural Science Foundation  
350 of China (81630061, 82041006) and the CAMS Innovation Fund for Medical Sciences  
351 (2017-I2M-1-014). **Author contributions:** Conceptualization, Y.H., and T.L.; Formal  
352 analysis, Y.Z., D.Y., Y.H.; Investigation, Y.Z., D.Y., Y.H., H.C., L.R.; Resources, H.C., L.R.,  
353 J.W., T.L., Y.H.; Writing-Original Draft, Y.H.; Writing-Review & Editing, all authors;  
354 Funding acquisition, Y.H. and T.L.. **Declaration of interests:** Authors declare no competing  
355 interests. **Data and materials availability:** All data is available in the main text or the

356 supplementary materials.

357

358 **Supplementary Materials**

359 Materials and Methods

360 Figures S1-S3

361

362 **Figure legends**

363 **Figure 1. Cross-reactivity of convalescent sera from SARS-CoV infected patients with**  
364 **SARS-CoV-2 determined by ELISA.**

365 **(A)** Reactivity of sera from 20 recovered SARS-CoV patients (P01 to P20) with the  
366 nucleoprotein (N) of SARS-CoV-2 was measured by a commercial ELISA kit.

367 **(B)** Reactivity of convalescent SARS sera with the recombinant S1 and RBD proteins of  
368 SARS-CoV.

369 **(C)** Reactivity of convalescent SARS sera with the S ectodomain (designated S), S1, RBD,  
370 and S2 proteins of SARS-CoV-2.

371 Serum samples from two healthy donors were used as negative control (Ctrl-1 and Ctrl-2).

372 The experiments were performed with duplicate samples and repeated three times, and data  
373 are shown as means with standard deviations.

374

375 **Figure 2. Neutralizing activity of convalescent sera from SARS patients against**  
376 **SARS-CoV and SARS-CoV-2 determined by single-cycle infection assay.**

377 **(A)** Neutralizing activity of convalescent patient sera was tested at a 1:20 dilution. Statistical  
378 significance was tested by two-way ANOVA with Dunnett posttest, indicating that all the sera  
379 significantly inhibited SARS-CoV and SARS-CoV-2 ( $p < 0.001$ ) but not VSV-G ( $p > 0.05$ )  
380 pseudoviruses to infect 293T/ACE2 cells.

381 **(B)** Neutralizing titers of each of convalescent patient sera on three pseudotypes were  
382 measured. The experiments were performed with triplicate samples and repeated three times,  
383 and data are shown as means with standard deviations.

384



385 **Figure 3. Cross-reactive and neutralizing activities of antisera from mice immunized**  
386 **with a full-length S protein of SARS-CoV.**

387 **(A)** Binding activity of mouse antisera at a 1:100 dilution to SARS-CoV (S1 and RBD) and  
388 SARS-CoV-2 (S, S1, RBD, and S2) antigens was determined by ELISA. A healthy mouse  
389 serum was tested as control.

390 **(B)** Neutralizing activity of mouse antisera at indicated dilutions against SARS-CoV,  
391 SARS-CoV-2, and VSV-G pseudoviruses was determined by a single-cycle infection assay.  
392 The experiments were performed in triplicates and repeated three times, and data are shown as  
393 means with standard deviations. Statistical significance was tested by two-way ANOVA with  
394 Dunnett posttest.

395 **Figure 4. Cross-reactive and neutralizing activities of antisera from mice immunized**  
396 **with RBD proteins of SARS-CoV.**

397 **(A)** Binding activity of mouse antisera at a 1:100 dilution to SARS-CoV (S1 and RBD) and  
398 SARS-CoV-2 (S protein and RBD) antigens was determined by ELISA. A healthy mouse  
399 serum was tested as control.

400 **(B)** Neutralizing activity of mouse antisera at indicated dilutions against SARS-CoV,  
401 SARS-CoV-2, and VSV-G pseudoviruses was determined by a single-cycle infection assay.  
402 The experiments were performed in triplicates and repeated three times, and data are shown as  
403 means with standard deviations. Statistical significance was tested by two-way ANOVA with  
404 Dunnett posttest.

405 **Figure 5. Cross-reactivity and neutralization of purified rabbit anti-RBD antibodies.**

406 **(A)** Binding titers of purified rabbit anti-RBD antibodies to SARS-CoV (RBD) and

407 SARS-CoV-2 (S, RBD, and S2) antigens were determined by ELISA. A healthy rabbit serum  
408 was tested as control.

409 **(B)** Neutralizing titers of purified rabbit anti-RBD antibodies on SARS-CoV, SARS-CoV-2,  
410 and VSV-G pseudoviruses was determined by a single-cycle infection assay. The experiments  
411 were done in triplicates and repeated three times, and data are shown as means with standard  
412 deviations.

413 **Figure 6. Inhibition of purified rabbit anti-RBD antibodies on the binding of RBD to**  
414 **293T/ACE2 cells.**

415 **(A)** Blocking activity of rabbit anti-RBD antibodies on the binding of SARS-CoV RBD  
416 (upper panel) or SARS-CoV-2 RBD (lower panel) to 293T/ACE2 cells was determined by  
417 flow cytometry.

418 **(B)** Purified rabbit anti-RBD antibodies inhibited the RBD-ACE2 binding does-dependently.  
419 The experiments repeated three times, and data are shown as means with standard deviations.  
420 Statistical significance was tested by two-way ANOVA with Dunnett posttest.

421 Figure 1

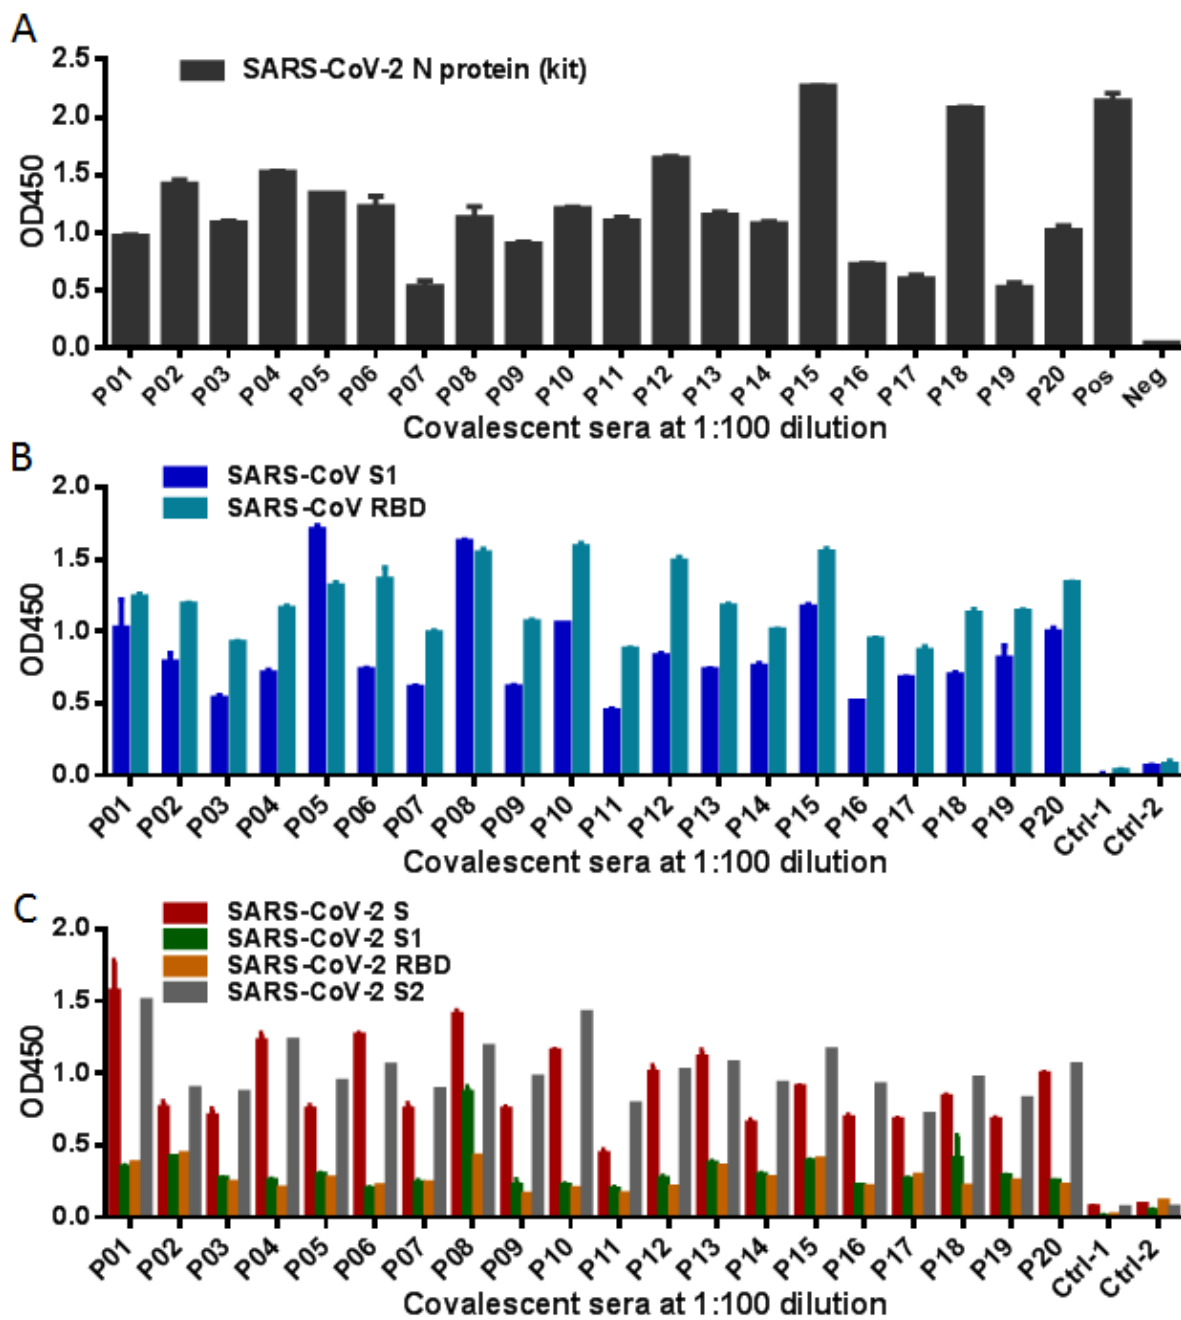

422

423

424 Figure 2

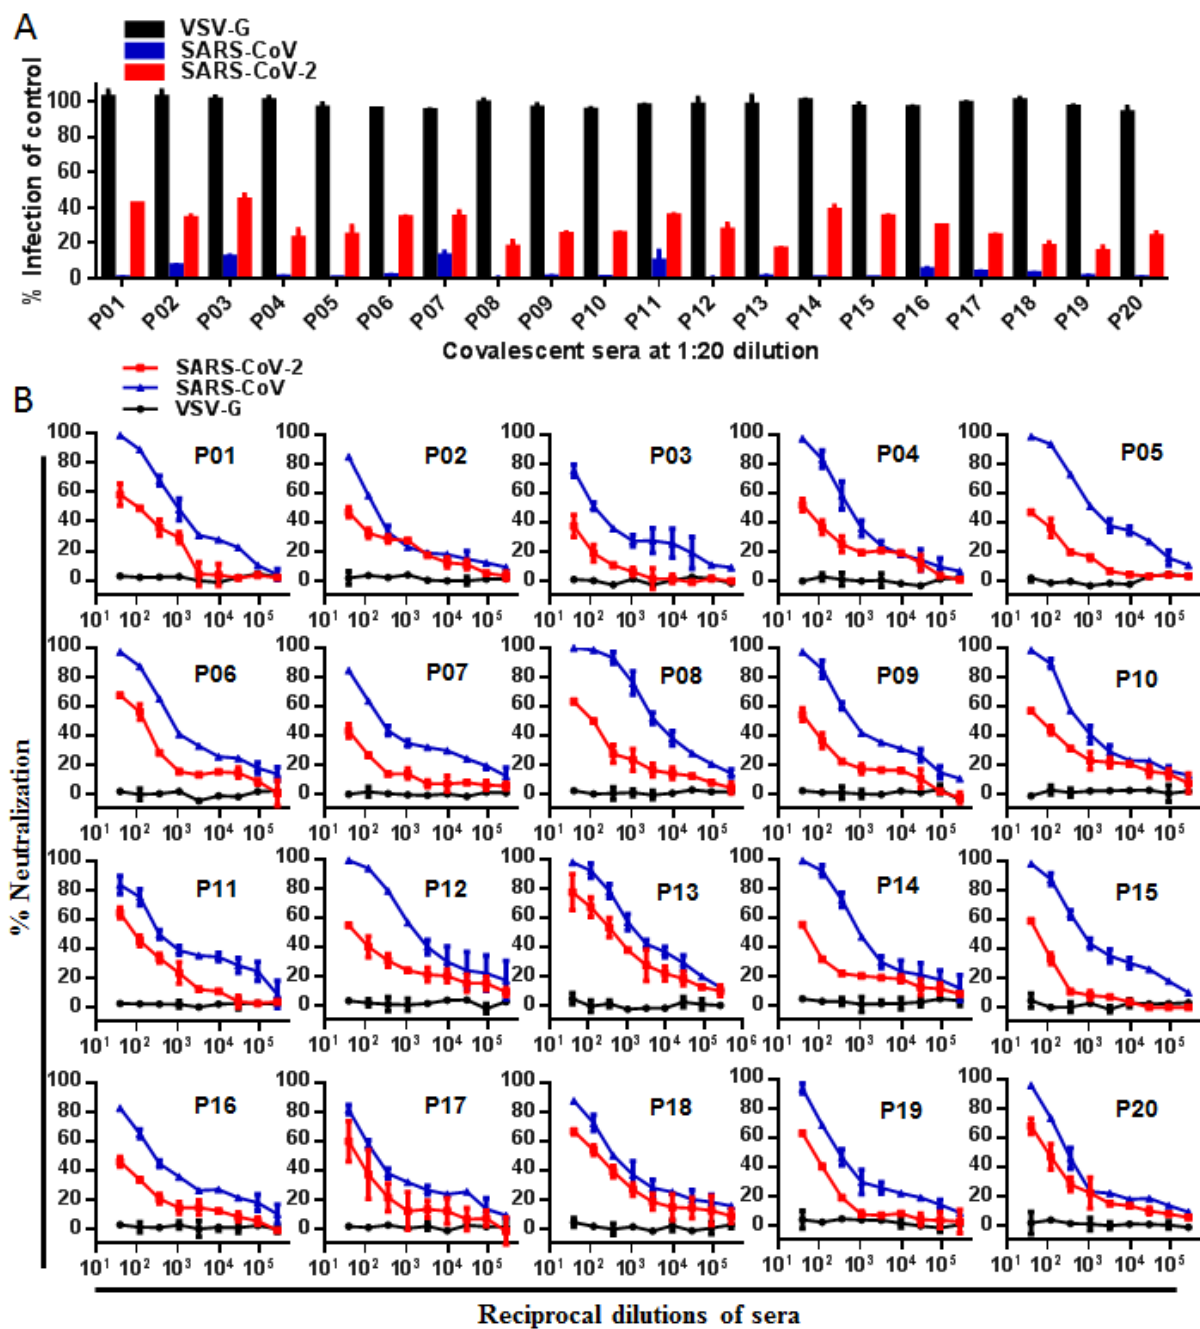

425

426

427 Figure 3

428

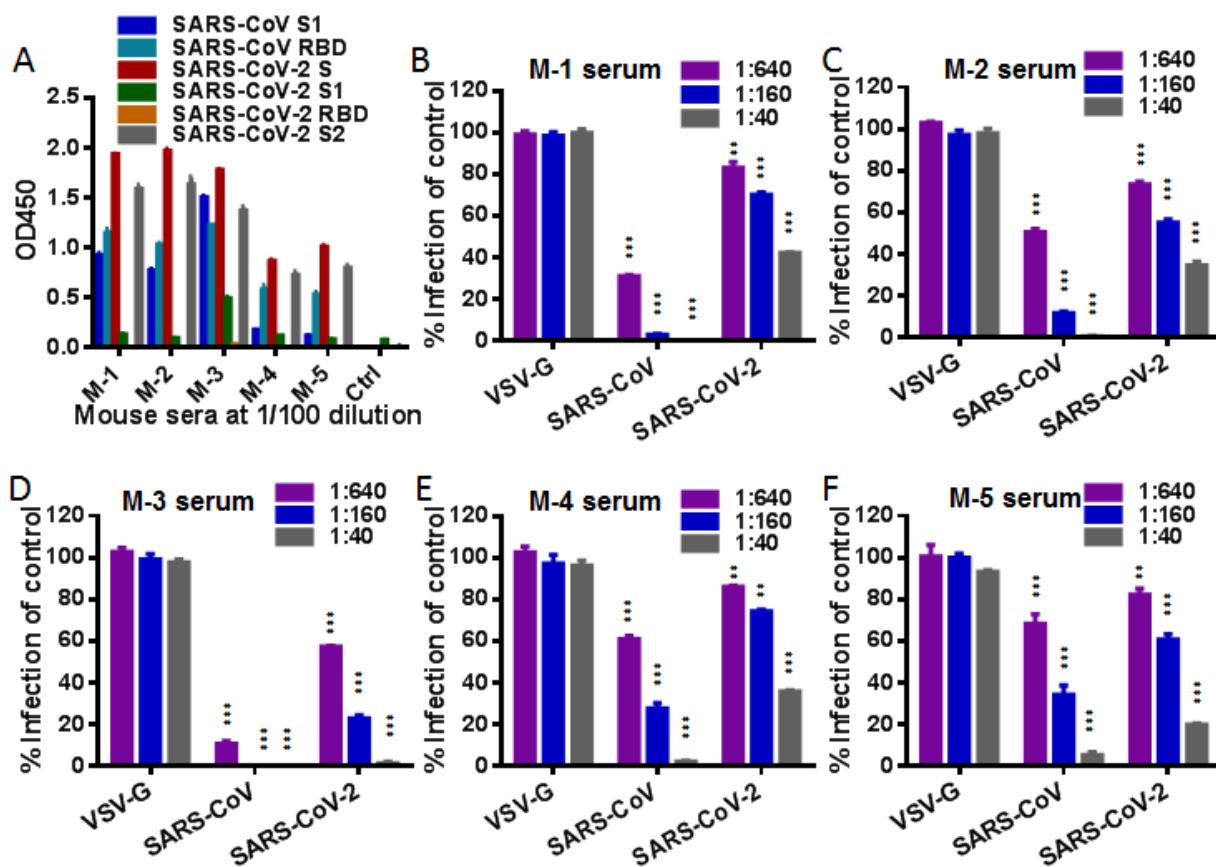

429

430

431 Figure 4

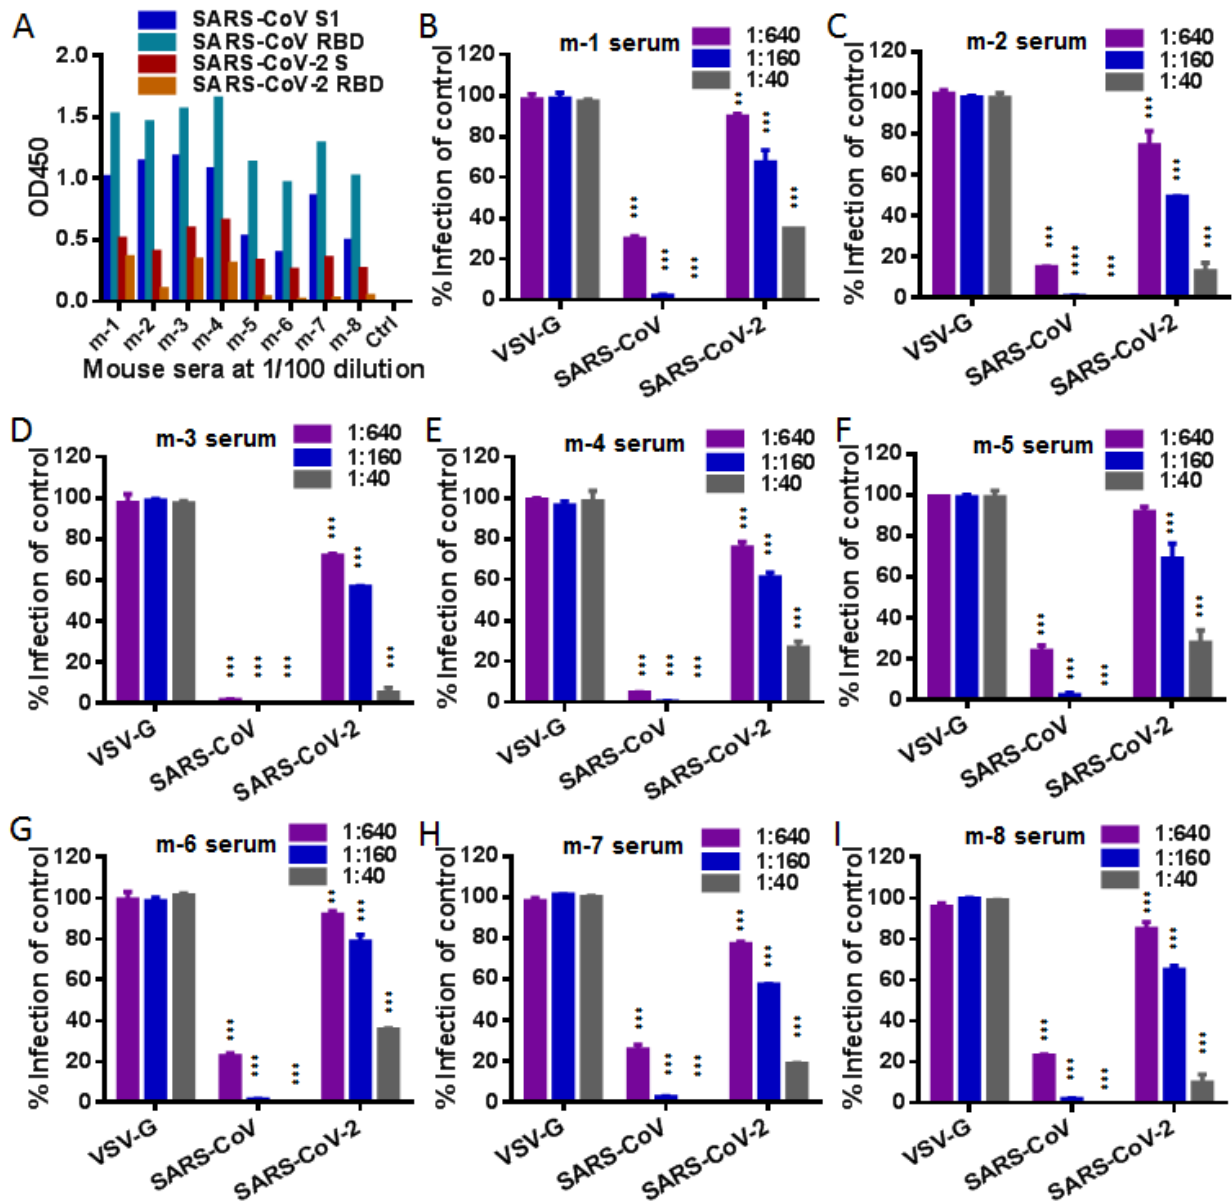

432

433

434 Figure 5

435

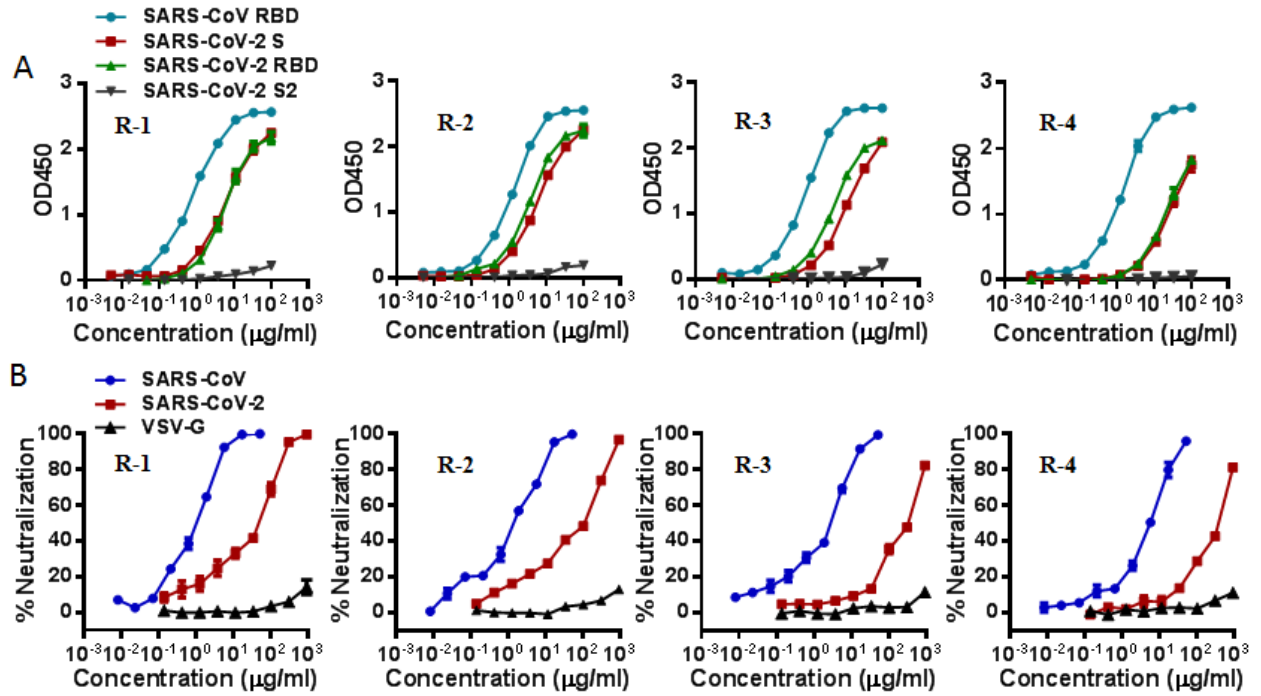

436

437

438 Figure 6

439

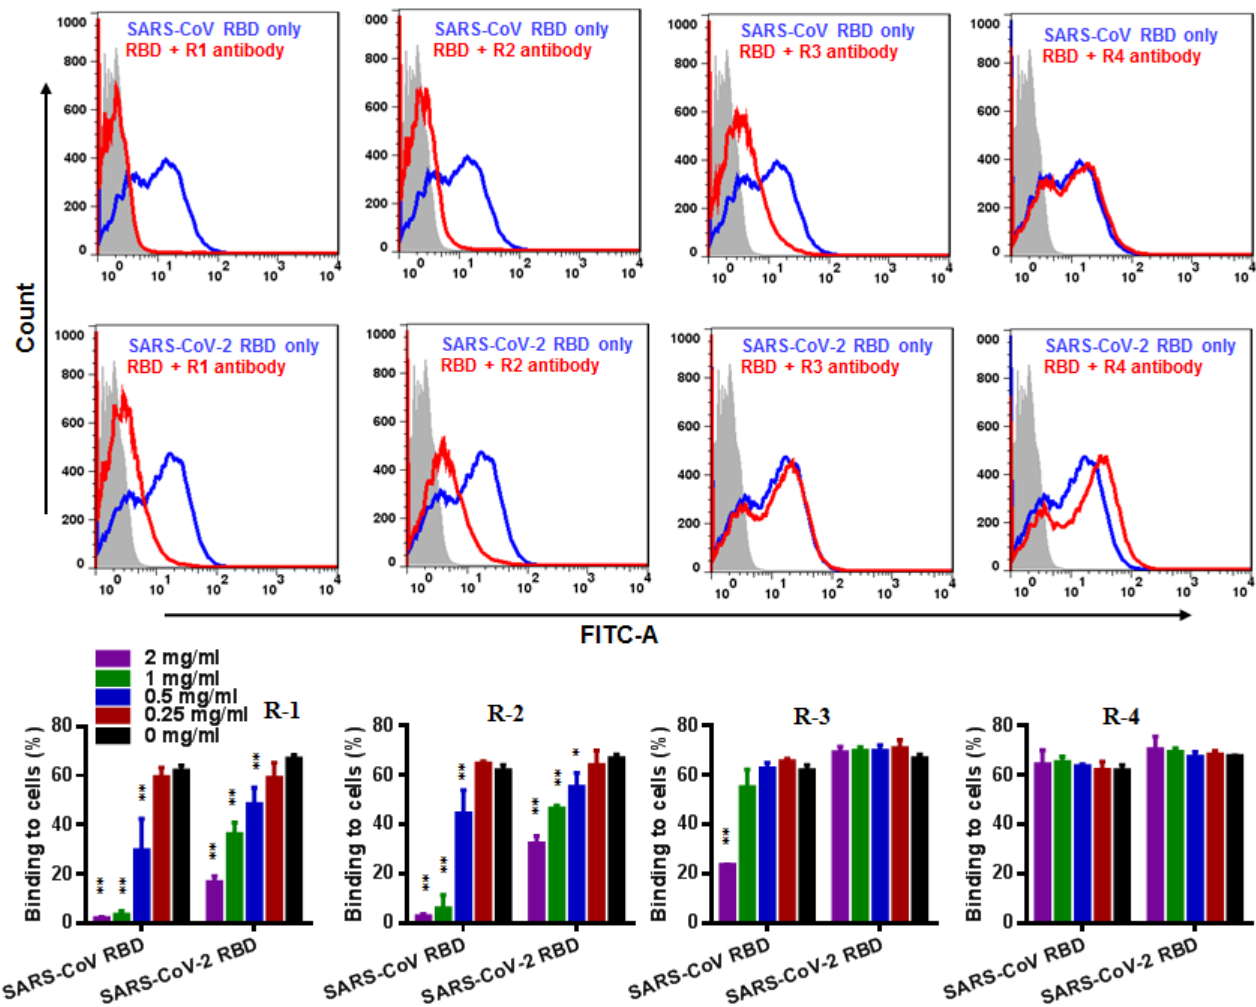

440

441



442 **Supplementary Materials for**

443

444 **Cross-reactive neutralization of SARS-CoV-2 by serum antibodies from recovered SARS**

445 **patients and immunized animals**

446 Yuanmei Zhu<sup>1†</sup>, Danwei Yu<sup>1†</sup>, Yang Han<sup>2†</sup>, Hongxia Yan<sup>1</sup>, Huihui Chong<sup>1</sup>, Lili Ren<sup>1</sup>, Jianwei

447 Wang<sup>1\*</sup>, Taisheng Li<sup>2\*</sup>, Yuxian He<sup>1\*</sup>

448

449 \*Correspondence to: J.W. (wangjw28@163.com), T. L. (litsh@263.net), or Y.H.

450 (yhe@ipb.pumc.edu.cn).

451

452

453

454 **This PDF file includes:**

455 Materials and Methods

456 Figs. S1 to S3

457

## 458 **Materials and Methods**

### 459 **Recombinant S proteins**

460 Two RBD-Fc fusion proteins, which contain the RBD sequence of Himalayan palm civet  
461 SARS-CoV strain SZ16 (GenBank: AY304488.1) or the RBD sequence of human SARS-CoV  
462 strain GD03T0013 (GenBank: AY525636.1, denoted GD03) linked to the Fc domain of  
463 human IgG1, were expressed in transfected 293T cells and purified with protein A-Sepharose  
464 4 Fast Flow in our laboratory as previously described (15). A full-length S protein of  
465 SARS-CoV Urbani (GenBank: AY278741) was expressed in expressSF<sup>+</sup> insect cells with  
466 recombinant baculovirus D3252 by the Protein Sciences Corporation (Bridgeport, CT, USA)  
467 (16). A panel of recombinant proteins with a C-terminal polyhistidine (His) tag, including S1  
468 and RBD of SARS-CoV (GenBank: AAX16192.1) and S ectodomain (S-ecto), S1, RBD, and  
469 S2 of SARS-CoV-2 (GenBank: YP\_009724390.1), were purchased from the Sino Biological  
470 Company (Beijing, China).

### 471 **Serum samples from recovered SARS patients**

472 Twenty SARS patients were enrolled in March 2003 for a follow-up study at the Peking  
473 Union Medical College Hospital, Beijing. Serum samples were collected from recovered  
474 patients at 3-6 months after discharge, with the patients' written consent and the approval of  
475 the ethics review committee (23, 24). The samples were stored in aliquots at -80 °C and were  
476 heat-inactivated at 56 °C before performing experiments.

### 477 **Animal immunizations**

478 Multiple immunization protocols were conducted. First, five Balb/c mice (6 weeks old) were  
479 subcutaneously (s.c.) immunized with 20 µg of full-length S protein resuspended in

480 phosphate-buffered saline (PBS, pH 7.2) in the presence of MLP-TDM adjuvant or Alum  
481 adjuvant (Sigma-Aldrich). Second, eight Balb/c mice (6 weeks old) were s.c. immunized with  
482 20 µg of SZ16-RBD or GD03-RBD fusion proteins plus MLP-TDM adjuvant. The mice were  
483 boosted two times with 10 µg of the same antigens plus the MLP-TDM adjuvants at 3-week  
484 intervals. Third, four New Zealand White rabbits (12 weeks old) were immunized  
485 intradermally with 150 µg of SZ16-RBD or GD03-RBD resuspended in PBS (pH 7.2) in the  
486 presence of Freund's complete adjuvant and boosted two times with 150 µg of the same  
487 antigens plus incomplete Freund's adjuvant at 3-week intervals. Mouse and rabbit antisera  
488 were collected and stored at -40 °C.

#### 489 **Enzyme-linked immunosorbent assay (ELISA)**

490 Binding activity of serum antibodies with diverse S protein antigens was detected by ELISA.  
491 In brief, 50 ng of a purified recombinant protein (SARS-CoV S1 or RBD and SARS-CoV-2  
492 S-ecto, S1, RBD, or S2) were coated into a 96-well ELISA plate overnight at 4 °C. Wells were  
493 blocked with 5% bovine serum albumin (BSA) in PBS for 1 hour at 37 °C, followed by  
494 incubation with 1:100 diluted antisera or serially diluted purified rabbit antibodies for 1 hour  
495 at 37 °C. A diluted horseradish peroxidase (HRP)-conjugated goat anti-human, mouse or rabbit  
496 IgG antibody was added for 1 hour at room temperature. Wells were washed five times  
497 between each step with 0.1% Tween-20 in PBS. Wells were developed using  
498 3,3',5,5'-tetramethylbenzidine (TMB) and read at 450 nm after terminated with 2M H<sub>2</sub>SO<sub>4</sub>.

#### 499 **Neutralization assay**

500 Neutralizing activity of serum antibodies was measured by pseudovirus-based single cycle  
501 infection assay. The pseudovirus particles were prepared by co-transfecting HEK293T cells

502 with a backbone plasmid (pNL4-3.luc.RE) that encodes an Env-defective, luciferase  
503 reporter-expressing HIV-1 genome and a plasmid expressing the S protein of SARS-CoV-2  
504 (IPBCAMS-WH-01; GenBank: QHU36824.1) or SARS-CoV (GD03T0013) or the G protein  
505 of vesicular stomatitis virus (VSV). Cell culture supernatants containing virions were  
506 harvested 48 h post-transfection, filtrated and stored at -80°C. To measure the neutralizing  
507 activity of serum antibodies, a pseudovirus was mixed with an equal volume of serially  
508 diluted sera or purified antibodies and incubated at 37°C for 30 min. The mixture was then  
509 added to 293T/ACE2 cells at a density of  $10^4$  cells/100 µl per plate well. After cultured at 37  
510 °C for 48 h, the cells were harvested and lysed in reporter lysis buffer, and luciferase activity  
511 (relative luminescence unit, RLU) was measured using luciferase assay reagents and a  
512 luminescence counter (Promega, Madison, WI). Percent inhibition of serum antibodies  
513 compared to the level of the virus control subtracted from that of the cell control was  
514 calculated. The highest dilution of the serum sample that reduced infection by 50% or more  
515 was considered to be positive.

#### 516 **Flow cytometry assay**

517 Blocking activity of purified rabbit anti-RBD antibodies on the binding of RBD protein with a  
518 His tag to 293T/ACE2 cells was detected by flow cytometry assay. Briefly, 2 µg/ml of  
519 SARS-CoV-2 RBD protein or 10 µg/ml of SARS-CoV RBD protein were added to  $4 \times 10^5$  of  
520 cells and incubated for 30 min at room temperature. After washed with PBS two times, cells  
521 were incubated with a 1:500 dilution of Alexa Fluor<sup>®</sup> 488-labeled rabbit anti-His tag antibody  
522 (Cell Signaling Technology, Danvers, MA) for 30 min at room temperature. After two washes,  
523 cells were resuspended in PBS and analyzed by FACSCantoII instrument (Becton Dickinson,

524 Mountain View, CA).

525 **Statistical analysis**

526 Statistical analyses were carried out using GraphPad Prism 7 Software. One-way or two-way  
527 analysis of variance (ANOVA) with Dunnett posttest was used to test for statistical  
528 significance. Only p values of 0.05 or lower were considered statistically significant ( $p > 0.05$   
529 [ns, not significant],  $p \leq 0.05$  [\*],  $p \leq 0.01$  [\*\*],  $p \leq 0.001$  [\*\*\*]).

530

531

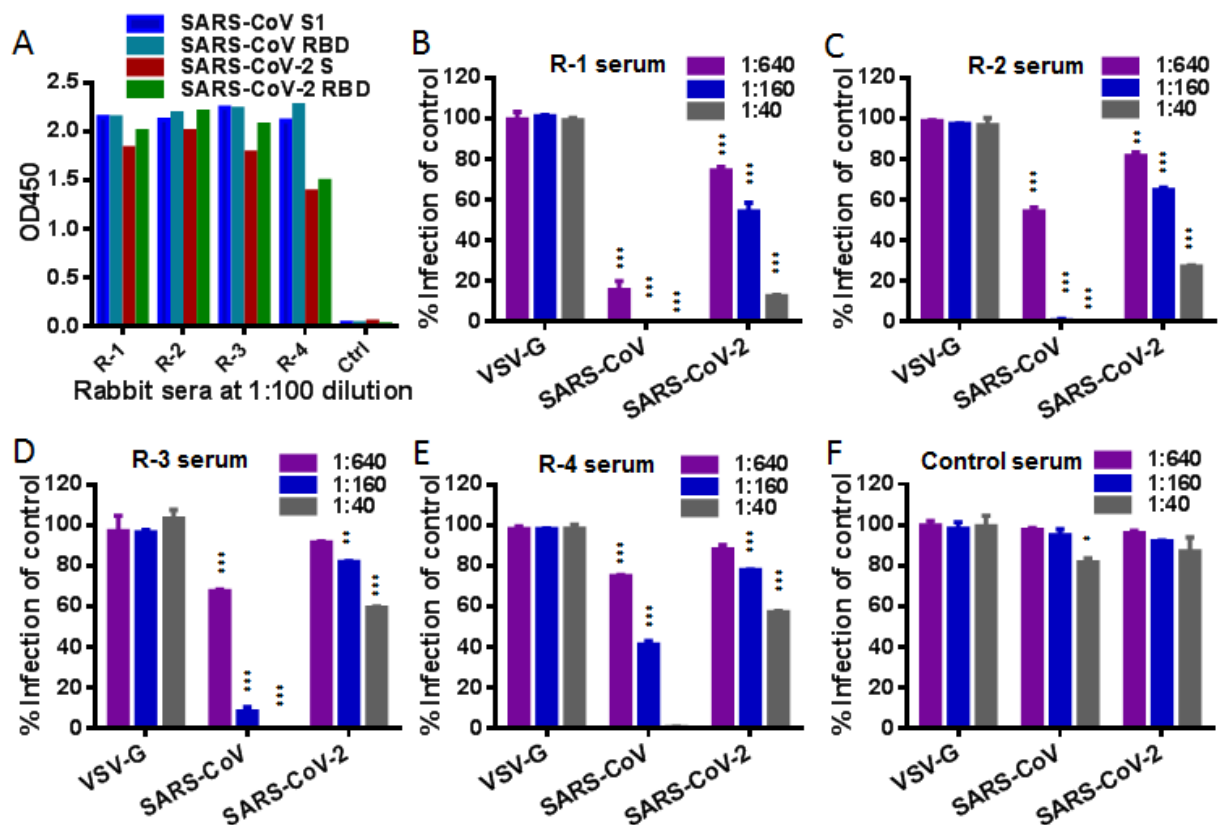

532

533 **Figure S1. Cross-reactive and neutralizing activities of antisera from rabbits immunized**  
534 **with the RBD proteins of SARS-CoV.**

535 (A) Binding activity of rabbit antisera at a 1:100 dilution to SARS-CoV (S1 and RBD) and  
536 SARS-CoV-2 (S protein and RBD) antigens was determined by ELISA. A healthy rabbit  
537 serum was tested as control.

538 (B) Neutralizing activity of rabbit antisera or control serum at indicated dilutions on  
539 SARS-CoV, SARS-CoV-2, and VSV-G pseudoviruses was determined by a single-cycle  
540 infection assay. The experiments were done in triplicates and repeated three times, and data  
541 are shown as means with standard deviations. Statistical significance was tested by two-way  
542 ANOVA with Dunnett posttest.

543

544

545

546

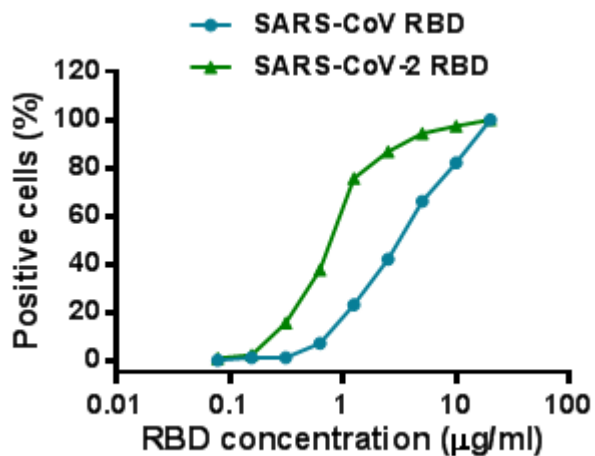

547

548 **Figure S2. Binding activity of RBD proteins to 293T/ACE2 cells determined by flow**

549 **cytometry.** The assay was repeated two times and obtained consistent results, and

550 representative data are shown.

551

552

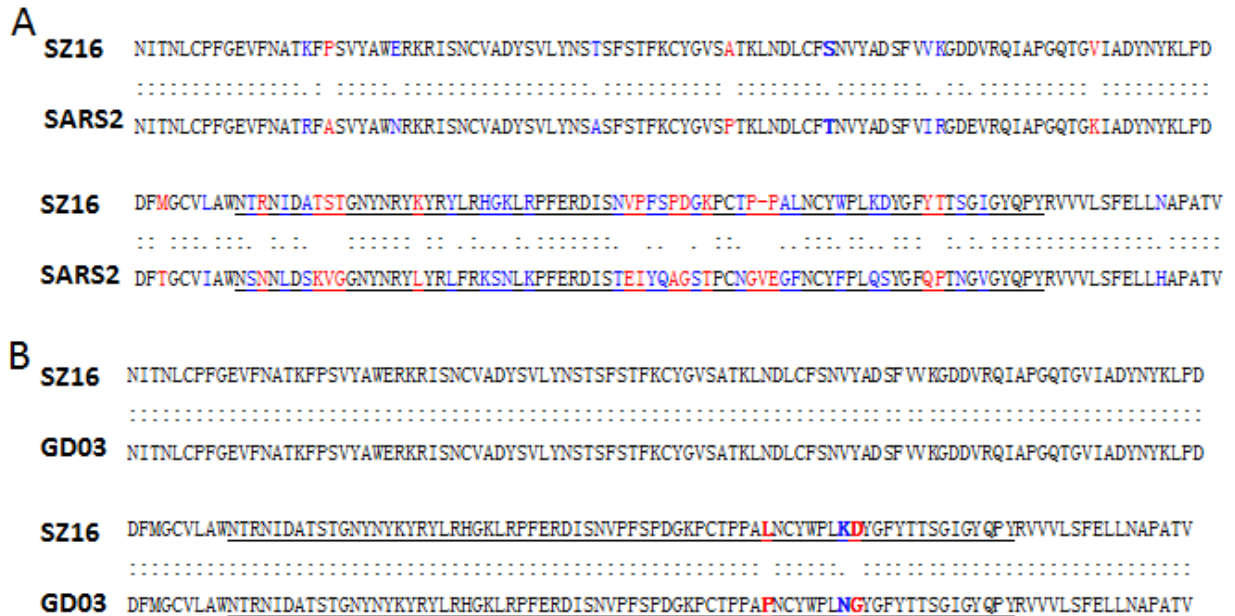

553

554

555 **Figure S3. Sequence comparison between the RBDs of SARS-CoV and SARS-CoV-2.**

556 (A) RBD comparison of the palm civet SARS-CoV strain SZ16 and the human SARS-CoV-2  
557 strain IPBCAMS-WH-01 (designated SARS2). (B) RBD comparison of the palm civet  
558 SARS-CoV strain SZ16 and the human SARS-CoV strain GD03T0013. Conservative and  
559 non-conservative mutations are marked in blue and red, respectively.
